# Supplementary material for: Prognostic Impact of TP53 Mutations in Diffuse Large B-Cell Lymphoma
Source: Research Square preprint supplement (doi:10.21203/rs.3.rs-8231260/v1), 2025-12-10
Supplement: Supplementary file 1 [file 2d0d7a569b3c8a55c1ea4d19.docx]

**Table S1** The mutational characteristics of double-hit and double-expressor in TP53-mutant patients

|  | Nucleotide position | Protein description | Variation frequence |
| --- | --- | --- | --- |
| Double-hit lymphoma |  |  |  |
| Case 1 | c.514G>A | p.V172I | 11% |
| Case 2 | c.737_752delins16 | p.M246 | 43.4% |
| Case 3 | c.743G>A | p.R248Q | 92.6% |
| Case 4 | c.743G>A | p.R248Q | 52.6% |
| Case 5 | c.376-2A>G |  | 31.9% |
| Double-expressor lymphoma |  |  |  |
| Case 1 | c.514G>A | p.V172I | 11% |
| Case 2 | c.743G>A | p.R248Q | 52.6% |
| Case 3 | c.376-2A>G |  | 31.9% |
| Case 4 | c.A840T | p.R280S | 34.8% |
| Case 5 | c.724T>C | p.C242R | 26.5% |
| Case 6 | c.920-1G>A |  | 10.4% |
| Case 7 | c.818G>A | p.R273H | 31.7% |
| Case 8 | c.830G>T | p.C277F | 22.3% |
| Case 9 | c.700T>G | p.Y234D | 31.8% |
| Case 10 | c.844C>T | p.R282W | 45.5% |
| Case 11 | c.716A>G | p.N239S | 18.1% |
| Case12 | c.725G>A | p.C242Y | 13.2% |
| Case 13 | c.326T>C | p.F109S | 35.2% |
| Case 14 | c.818G>A | p.R273H | 79.2% |
| Case 15 | c.818G>A | p.R273H | 61.7% |
| Case 16 | p.V272G | p.V272G | 27.9% |
| Case 17 | c.733G>A | p.G245S | 57.1% |
| Case 18 | c.733G>A | p.G245S | 10.8% |
| Case 19 | c.637C>T | p.R213* | 98.4% |
| Case 20 | c.524G>A | p.R175H | 64.6% |
| Case 21 | c.G527T | p.C176F | 10.4% |
| Case 22 | c.725G>A | p.C242Y | 33.9% |
| Case 23 | c.1079G>C | p.G360A | 48% |
| Case 24 | c.T537G, c.C476T | p.H179Q,p.A159V | 50.2%,26.8% |
| Case 25 | c.396G>T | K132N | 84.7% |
| Case 26 | c.715A>G | p.N239D | 24.9% |
| Case 27 | c.524G>A | p.R175H | 64.6% |
| Case 28 | c.638G>A | p.R213Q | 25.6% |
| Case 29 | c.743G>A | p.R248Q | 15.7% |
| Case 30 | c.817C>T | p.R273C | 83.9% |
| Case 31 | c.818G>A | p.R273H | 35.5% |
| Case 32 | c.818G>A | p.R273H | 48.1% |
| Case 32 | c.A840T | p.R280S | 34.7% |
| Case 33 | c.559+1G>A |  | 60.8% |
| Case 34 | c.C586T | p.R196* | 72.4% |
| Case 35 | c.524G>A | p.R175H | 47.2% |
| Case 36 | c.517G>A | p.V173M | 30.6% |
| Case 37 | c.707A>C | p.Y236S | 74.1% |
| Case 38 | c.829T>G | p.C277G | 54.5% |
