# Supplementary material for: Prognostic Impact of TP53 Mutations in Diffuse Large B-Cell Lymphoma
Source: Research Square preprint supplement (doi:10.21203/rs.3.rs-8231260/v1), 2025-12-10
Supplement: Supplementary file 2 [file 33e6ea17648f4f570442aad5.docx]

**Table S8** The univariate and multivariate analysis of OS in patients with DLBCL

| Variable | Univariable COX regression | | Multivariable COX regression | |
| --- | --- | --- | --- | --- |
| *p*-value | HR (95%CI) | *p*-value | HR (95%CI) |
| Age≥60years | <0.001 | 2.72 (0.81 ~ 2.19) |  |  |
| Gender: Male | 0.238 | 1.31 (0.84 ~ 2.06) |  |  |
| TP53:Mutant | <0.001 | 2.78 (1.77 ~ 4.37) | 0.011 | 2.06 (1.18 ~ 3.62) |
| MYD88:Mutant | 0.167 | 0.67 (0.38 ~ 1.18) |  |  |
| CD79B: Mutant | 0.223 | 0.67 (0.35 ~ 1.27) |  |  |
| Ann Arbor Stage: III－IV | 0.263 | 1.33 (0.81 ~ 2.19) |  |  |
| Cell of origin:non-GCB | 0.877 | 1.04 (0.65 ~ 1.67) |  |  |
| ECOG≥2 | <0.001 | 2.74 (1.74 ~ 2.43) | 0.002 | 2.42 (1.38 ~ 4.27) |
| IPI score: 3-5 | 0.083 | 1.52 (0.95 ~ 2.43) |  |  |
| B symptoms | 0.252 | 1.32 (0.82 ~ 2.11) |  |  |
| LDH＞UNV | 0.176 | 1.40 (0.86 ~ 2.28) |  |  |
| Extranodal involvement＞1 | 0.631 | 1.14 (0.67 ~ 1.93) |  |  |
| Bone marrow infiltration | 0.059 | 1.71 (0.98~ 2.98) |  |  |
| Bulky disease | 0.338 | 0.76 (0.43 ~ 1.34) |  |  |
| Double-hit lymphoma | 0.027 | 2.47 (1.11 ~ 5.49) | 0.032 | 2.40 (1.08~ 5.37) |
| Double-expressor lymphoma | 0.941 | 1.02 (0.63~ 1.64) |  |  |
