# Supplementary material for: Prognostic Impact of TP53 Mutations in Diffuse Large B-Cell Lymphoma
Source: Research Square preprint supplement (doi:10.21203/rs.3.rs-8231260/v1), 2025-12-10
Supplement: Supplementary file 3 [file 3a39702143d9d6725dd0eb3a.docx]

**Table S6** The univariate and multivariate analysis of PFS in patients with DLBCL

| Variable | Univariable COX regression | | Multivariable COX regression | |
| --- | --- | --- | --- | --- |
| *p*-value | HR (95%CI) | *p*-value | HR (95%CI) |
| Age≥60years | 0.004 | 1.72 (1.19 ~ 2.49) |  |  |
| Gender: Male | 0.867 | 0.97 (0.67 ~ 1.40) |  |  |
| TP53:Mutant | <0.001 | 2.37 (1.64 ~ 3.44) | ＜0.001 | 2.02(1.38 ~ 2.95) |
| MYD88:Mutant | 0.193 | 0.74 (0.47 ~ 1.16) |  |  |
| CD79B: Mutant | 0.174 | 0.70 (0.42 ~ 1.17) |  |  |
| Ann Arbor Stage: III－IV | <0.001 | 2.10 (1.36 ~ 3.24) |  |  |
| Cell of origin:non-GCB | 0.981 | 1.00 (0.68 ~ 1.49) |  |  |
| ECOG≥2 | <0.001 | 2.28 (1.57 ~ 3.30) | 0.012 | 1.67 (1.12 ~ 2.49) |
| IPI score: 3-5 | <0.001 | 2.30 (1.54 ~ 3.43) | 0.002 | 1.94 (1.27 ~ 2.97) |
| B symptoms | 0.608 | 1.11 (0.75 ~ 1.65) |  |  |
| LDH＞UNV | 0.018 | 1.64 (0.75 ~ 1.65) |  |  |
| Extranodal involvement＞1 | 0.058 | 1.57 (0.99 ~ 2.50) |  |  |
| Bone marrow infiltration | 0.014 | 1.78 (1.12 ~ 2.83) |  |  |
| Bulky disease | 0.290 | 1.26 (0.82 ~ 1.93) |  |  |
| Double-hit lymphoma | 0.180 | 1.65 (0.79 ~ 3.43) |  |  |
| Double-expressor lymphoma | 0.281 | 0.81 (0.55 ~ 1.19) |  |  |
