# Supplementary material for: Prognostic Impact of TP53 Mutations in Diffuse Large B-Cell Lymphoma
Source: Research Square preprint supplement (doi:10.21203/rs.3.rs-8231260/v1), 2025-12-10
Supplement: Supplementary file 4 [file 536d41501653b5b6549a0aa9.docx]

**Table S2** The relationship between TP53 mutation location and clinical characteristics

| Characteristics | Non-DBD（n=9） | DBD（n=80） | *p*-value |
| --- | --- | --- | --- |
| Age≥60years | 4/9 (44.4%) | 40/80 (50.0%) | 1.0 |
| Gender: Male | 7/9 (77.8%) | 44/89 (55.0%) | 0.34 |
| MYD88:Mutant | 1/9 (11.1%) | 12/80 (15.0%) | 1.0 |
| CD79B: Mutant | 1/9 (11.1%) | 7/80 (8.8%) | 0.590 |
| Ann Arbor Stage: III－IV | 8/9 (88.9%) | 46/78 (59.0%) | 0.165 |
| Cell of origin:non-GCB | 8/9 (88.9%) | 43/79 (54.4%) | 0.104 |
| ECOG≥2 | 5/9 (55.6%) | 39/80 (48.7%) | 0.972 |
| IPI score: 3-5 | 5/9 (55.6%) | 40/77 (52.0%) | 1.0 |
| B symptoms | 5/9 (55.6%) | 21/78 (26.9%) | 0.164 |
| LDH＞UNV | 8/9 (88.9%) | 45/80 (56.3%) | 0.125 |
| Extranodal involvement＞1 | 7/9 (77.8%) | 63/80 (78.7%) | 1.0 |
| Bone marrow infiltration | 2/9 (22.2%) | 16/80 (20.0%) | 1.0 |
| Bulky disease | 2/9 (22.2%) | 17/80 (21.3%) | 1.0 |
| Double-hit lymphoma | 0/9 (0%) | 5/54 (9.3%) | 1.0 |
| Double-expressor lymphoma | 4/9 (44.4%) | 34/73 (46.6%) | 1.0 |
