# Supplementary material for: Prognostic Impact of TP53 Mutations in Diffuse Large B-Cell Lymphoma
Source: Research Square preprint supplement (doi:10.21203/rs.3.rs-8231260/v1), 2025-12-10
Supplement: Supplementary file 5 [file 8daa23033fc74d0e3c06f50e.docx]

**Table S4** The relationship between variant allele frequency (VAF) and clinical characteristics

| Characteristics | VAF＜50% (n=61) | VAF≥50% (n=28) | *p*-value |
| --- | --- | --- | --- |
| Age≥60years | 28/61 (45.9%) | 16/28 (57.1%) | 0.325 |
| Gender: Male | 33/61 (54.1%) | 18 /28 (64.3%) | 0.367 |
| MYD88:Mutant | 10/61 (16.4%) | 3/28 (10.7%) | 0.703 |
| CD79B: Mutant | 6/61 (9.8%) | 2/28 (7.1%) | 0.989 |
| Ann Arbor Stage: III－IV | 35/60 (58.3%) | 19/27 (70.4%) | 0.284 |
| Cell of origin:non-GCB | 32/60 (53.3%) | 19/28 (67.9%) | 0.199 |
| ECOG≥2 | 28 /61 (45.9%) | 16/28 (57.1%) | 0.325 |
| IPI score: 3-5 | 31/59 (52.5%) | 14/27 (51.9%) | 0.953 |
| B symptoms | 15/60 (25.0%) | 11/27 (40.7%) | 0.138 |
| LDH＞UNV | 33/61 (54.1%) | 20/28 (71.4%) | 0.122 |
| Extranodal involvement＞1 | 46/61 (73.8%) | 25/28 (89.3%) | 0.097 |
| Bone marrow infiltration | 10/61 (16.4%) | 8/28 (28.6%) | 0.184 |
| Bulky disease | 14/61 (23.0%) | 5/28 (17.9%) | 0.586 |
| Double-hit lymphoma | 3/44 (6.8%) | 2 /19 (10.5%) | 1.0 |
| Double-expressor lymphoma | 25/55 (45.5%) | 13/27 (48.2%) | 0.818 |
