# Supplementary material for: Prognostic Impact of TP53 Mutations in Diffuse Large B-Cell Lymphoma
Source: Research Square preprint supplement (doi:10.21203/rs.3.rs-8231260/v1), 2025-12-10
Supplement: Supplementary file 6 [file 8ffc7f7c10a79e128147d0a3.docx]

**Table S3** The relationship between TP53 mutation types and clinical characteristics

| Characteristics | Non-missense mutation（n=16） | Missense mutation（n=73） | *p*-value |
| --- | --- | --- | --- |
| Age≥60years | 9/16 (56.3%) | 35/73 (48.0%) | 0.547 |
| Gender: Male | 10/16 (62.5%) | 41/73 (56.2%) | 0.643 |
| MYD88:Mutant | 2/16 (12.5%) | 11/73 (15.1%) | 1.0 |
| CD79B: Mutant | 1/16 (6.3%) | 7/73 (9.6 %) | 1.0 |
| Ann Arbor Stage: III－IV | 11/16 (68.8%) | 43/71 (60.6%) | 0.542 |
| Cell of origin:non-GCB | 11/16 (68.8%) | 40/72 (55.6%) | 0.333 |
| ECOG≥2 | 10/16 (62.5%) | 34/73 (46.6%) | 0.249 |
| IPI score: 3-5 | 8/16 (50.0%) | 37/70 (52.9%) | 0.836 |
| B symptoms | 7/16 (43.8%) | 19/69 (28.4%) | 0.299 |
| LDH＞UNV | 12/16 (75.0%) | 41/73 (56.8%) | 0.164 |
| Extranodal involvement＞1 | 11/16 (68.8%) | 59/73 (80.8%) | 0.465 |
| Bone marrow infiltration | 4/16 (25.0%) | 14/74 (19.2%) | 0.856 |
| Bulky disease | 3/16 (18.8%) | 16 /74 (21.6%) | 0.799 |
| Double-hit lymphoma | 1/14 (7.1%) | 4/49 (8.2%) | 1.0 |
| Double-expressor lymphoma | 5/16 (31.3%) | 33/66 (50.0%) | 0.177 |
