# Supplementary material for: Prognostic Impact of TP53 Mutations in Diffuse Large B-Cell Lymphoma
Source: Research Square preprint supplement (doi:10.21203/rs.3.rs-8231260/v1), 2025-12-10
Supplement: Supplementary file 7 [file 95c8f8dd92636c5de67bd4ba.docx]

**Table S5** The relationship between P53 protein expression rate and TP53 mutation characteristics

|  | p53 protein expression＞75% | p53 protein expression ≤75% | *p*-value |
| --- | --- | --- | --- |
| Mutation region |  |  | 0.06 |
| DBD | 41/42 (97.6%) | 16/20 (80.0%) |  |
| Non-DBD | 1/42 (2.4%) | 4/20 (20.0%) |  |
| Mutation type |  |  | 0.093 |
| Missense mutation | 38/42 (90.5%) | 14/20 (70.0%) |  |
| Non-missense mutation | 4/42 (9.5%) | 6/20 (30.0%) |  |
| VAF |  |  | 0.254 |
| VAF≥50% | 9/42 (21.4%) | 7/20 (35.0%) |  |
| VAF＜50% | 33/42 (78.6%) | 13/20 (65.0%) |  |
