# Supplementary material for: Prognostic Impact of TP53 Mutations in Diffuse Large B-Cell Lymphoma
Source: Research Square preprint supplement (doi:10.21203/rs.3.rs-8231260/v1), 2025-12-10
Supplement: Supplementary file 8 [file c42473a5803d90a56a623b4f.docx]

**Supplementary Figure 1.** The p53 protein expression rate.

**Supplementary Figure 2.** (A) PFS analysis based on TP53 mutational status in DLBCL patients. (B) OS analysis based on TP53 mutational status in DLBCL patients.

**Supplementary Figure 3.** Kaplan-Meier curves of mutation-related characteristics for TP53-mut DLBCL patients. (A-B) mutation location. (C-D) mutation types. (E-F) VAF.

**Supplementary Figure 4.** Kaplan-Meier curves of DBD (exon 5–8) for TP53-mut DLBCL patients. (A) exon 5, PFS. (B) exon 5, OS. (C) exon 6, PFS. (D) exon 6, OS. (E) exon 7, PFS. (F) exon 7, PFS. (G) exon 8, PFS. (G) exon 8, OS.

**Supplementary Figure 5.** Kaplan-Meier curves of DBD motifs for TP53-mut DLBCL patients. (A) Loop-L2 domain, PFS. (B) Loop-L2 domain, OS. (C) Loop-L3 domain, PFS. (D) Loop-L3 domain, OS. (E) LSH domain, PFS. (F) LSH domain, OS.

**Supplementary Figure 6.** Kaplan-Meier curves of treatment for DLBCL patients. (A) ZR-CHOP, PFS. (B) ZR-CHOP, OS. (C) CAR-T/ASCT, PFS. (D) CAR-T/ASCT, OS.

**Supplementary Figure 7.** Kaplan-Meier curves comparing TP53 high-risk hotspot mutations with TP53-wt. (A) PFS. (B) OS.

**Supplementary Figure 8.** Kaplan-Meier curves of PFS comparing TP53-mut and TP53-wt. (A) DEL, PFS. (B) DEL, OS. (C) DHL, PFS. (D) DHL, OS.

**Supplementary Figure 9.** Kaplan-Meier curves of PFS comparing TP53-mut and TP53-wt. (A) DEL vs. Non-DEL,PFS. (B) DEL vs. Non-DEL,OS. (C) DHL vs. Non-DHL, PFS. (D) DHL vs. Non-DHL, OS.
